# 1    **Disruption of flour beetle microbiota limits experimentally evolved immune** 2    **priming response, but not pathogen resistance**

3    Arun Prakash<sup>1#</sup>, Deepa Agashe<sup>1</sup> & Imroze Khan<sup>2\*</sup>

4

5    <sup>1</sup>National Centre for Biological Sciences  
6    Tata Institute of Fundamental Research, GKVK,  
7    Bellary Road, Bangalore, Karnataka, India 560065

8

9    <sup>2</sup>Ashoka University  
10    Plot No. 2, Rajiv Gandhi Education City  
11    Sonapat, Rai, Haryana, India 131029

12

13

14    \*Corresponding author  
15    [imroze.khan@ashoka.edu.in](mailto:imroze.khan@ashoka.edu.in)

16

17

18    <sup>#</sup>Current address: Vanderbilt University  
19    465 21st Ave S, MRB-III  
20    Biological Sciences, Nashville, TN 37212, USA

21

22

23

24    **Keywords:** Basal infection response, Microbiota, Experimental Evolution, Fitness effects,  
25    Immune priming

26 **ABSTRACT:**

27 Host-associated microbiota play a fundamental role in the training and induction of  
 28 different forms of immunity, including inducible as well as constitutive components.  
 29 However, direct experiments analysing the relative importance of microbiota during  
 30 evolution of different immune functions are missing. We addressed this gap by using  
 31 experimentally evolved lines of *Tribolium castaneum* that either produced inducible  
 32 immune memory-like responses (immune priming) or constitutively expressed basal  
 33 resistance (without priming), as mutually exclusive strategies against *Bacillus thuringiensis*  
 34 infection. We disrupted the microbial communities in these evolved lines and estimated the  
 35 impact on the beetle's ability to mount a priming response vs basal resistance. Populations  
 36 that had evolved immune priming lost the ability to mount a priming response upon  
 37 microbiota disruption. Microbiota manipulation also caused a drastic reduction in their  
 38 reproductive output and post-infection longevity. In contrast, in pathogen-resistant beetles,  
 39 microbiota manipulation did not affect post-infection survival or reproduction. The  
 40 divergent evolution of immune responses across beetle lineages was thus associated with  
 41 divergent reliance on the microbiome. Whether the latter is a direct outcome of differential  
 42 pathogen exposure during selection or reflects evolved immune functions remains unclear.  
 43 We hope that our results will motivate further experiments to understand the mechanistic  
 44 basis of these complex evolutionary associations between microbiota, host immune  
 45 strategies, and fitness outcomes.

46

## 47 INTRODUCTION:

48 Growing evidence reveals the critical role of microbiota in altering various aspects of host  
 49 development, behaviour, and reproduction (Gould et al., 2018), as well as in training and  
 50 induction of host immune responses (Zheng et al., 2020). In many species, including  
 51 humans, the microbiota is required for successfully mounting different forms of immunity  
 52 (e.g., innate vs adaptive) (Chudnovskiy et al., 2016; Karimi et al., 2009; Mazmanian et al.,  
 53 2005; Muhammad et al., 2019), such that depletion or loss of microbial diversity can  
 54 increase the vulnerability to pathogens (Dillon and Dillon, 2003; Engel and Moran, 2013).  
 55 Gut bacteria can also influence tissues, cells and molecular pathways involved in  
 56 gastrointestinal immunity, and changes in microbiome composition leads to overactive  
 57 inflammatory responses causing bowel disorders (Kostic et al., 2014). Together, these  
 58 results indicate an optimal association between host and microbiota forged over a long  
 59 coevolutionary history (Lee and Mazmanian, 2010), to appropriately train and regulate  
 60 immune responses (Belkaid and Hand, 2014; Thaïss et al., 2016). Recent studies also suggest  
 61 a role for microbiota in inducing immune memory-like responses in insects (immune  
 62 priming), whereby prior exposure to a low dose of infection improves survival against a  
 63 lethal infection caused by the same pathogen later in life (Futo et al., 2015; Muhammad et  
 64 al., 2019). Thus, host microbiomes appear to be generally important in shaping various  
 65 forms of immunity across diverse taxa.

66 However, it is less clear whether microbiota are similarly important in shaping different host  
 67 immune strategies. Host immune systems can evolve to new equilibrium states reflecting  
 68 distinct immune strategies in response to different pathogen selection pressures (Mayer et  
 69 al., 2016, Khan et al. 2017). Although experimental support is missing, host-associated  
 70 microbiota, owing to their immunomodulatory role, might also exhibit correlated changes as  
 71 host immune functions diverge (Zheng et al., 2020). However, although pathogen resistance  
 72 is one of the major evolutionary advantages conferred by microbiota (McLaren and  
 73 Callahan, 2020), there are no experiments to test whether or to what extent the role of  
 74 microbiota varies across divergent forms of host immunity. We thus conducted a proof-of-  
 75 principle study to analyse the impacts of microbiota in replicated experimental evolution  
 76 lines of flour beetle *Tribolium castaneum* that separately evolved either constitutively  
 77 expressed higher basal resistance, or inducible immune priming responses against their

78 natural pathogen *Bacillus thuringiensis* (Bt) (Khan et al., 2017; Prakash et al., 2022). We  
79 disrupted the microbiome of these evolved lines to test whether their evolved immune  
80 strategies and fitness traits depended on the host-associated microbiome.

## 81 **MATERIALS & METHODS**

82 We used previously described, replicate populations of *T. castaneum* that were infected in  
83 each generation with live Bt (strain DSM 2046), either with or without prior exposure to  
84 priming with heat-killed Bt cells to create distinct selection regimes (Khan et al., 2017; also  
85 see the supplementary information) as follows. (a) C populations: Control populations with  
86 no priming or infection; (b) PI populations: Priming with heat killed Bt, followed by infection  
87 with live Bt (PI); and (c) I populations: Mock priming (i.e., injected with insect Ringer),  
88 followed by infection with live Bt. Of the 4 original replicate populations per selection  
89 regime, in the present work, we analysed three replicates (total 9 populations). After 14  
90 generations of continuous selection, we found that I populations only evolved priming  
91 responses, whereas PI beetles had higher basal resistance (Prakash et al., 2022) as mutually  
92 exclusive responses— i.e., evolved populations either showed priming or resistance, but  
93 never produced both the responses together. In this study, we used the same beetle lines  
94 after another round of selection (i.e., 15 generations), then removed pathogen selection for  
95 two additional generations to minimize maternal or other epigenetic effects. We then  
96 collected “standardized” eggs to obtain experimental beetles with minimum non-genetic  
97 parental effects, to analyse the impact of disrupting microbiota on the already evolved  
98 immune responses (i.e., priming vs basal resistance).

## 99 **Experimental manipulation of the beetle microbiome and subsequent assays**

100 Previous work shows that the beetle microbiome is most likely acquired from the flour that  
101 the beetles inhabit and consume, and in which they also defecate and reproduce (Agarwal  
102 and Agashe, 2020). Beetles also derived significant fitness benefits from flour-acquired  
103 microbes, including higher fecundity and lifespan (Agarwal and Agashe, 2020). Thus, the  
104 easiest way to manipulate the beetle microbiome is to deplete the flour-associated  
105 microbial flora. We followed a previously published protocol in the lab (Agarwal and Agashe,  
106 2020), where thin layers of wheat flour were exposed to UV radiation (UV -C ~254nm) in a  
107 laminar airflow for 2h. This treatment significantly alters flour microbiome with drastic

depletion of the dominant bacterial taxa (also see Fig. S1 for reduction in CFUs on LB agar plates post UV-treatment). We then isolated single standardised eggs from each population in the wells of 96 well plates containing ~0.25 g of either UV-treated flour or normal wheat flour and reared them as virgins until adulthood. We did not track the sex of beetles in subsequent experiments (unless stated otherwise) because neither priming nor basal infection responses varied across sexes in our previous studies (Khan et al., 2017; Prakash et al., 2022). Below, we describe the assays performed with standardised beetles reared in normal vs UV-treated flour—

A. Evolved priming vs basal infection response: To prime and infect beetles, we used the septic injury method as described earlier (Khan et al., 2016; also see SI information). Briefly, 10-day old virgin I regime adults (24 beetles/priming treatment/ microbiota manipulation/ replicate population) were randomly assigned to one of the following treatments: beetles were either injected with insect Ringer solution (unprimed) or primed with heat-killed Bt cells adjusted to  $10^{11}$  cells/100µl Ringer solution (primed). Six days later, we infected all beetles with live Bt ( $\sim 10^{10}$  cells in 75 µl Ringer solution) and recorded their mortality for 14 days. We did not assay priming for C and PI beetles since they never showed a priming response in our earlier experiments (see the assay in generation 14, (Prakash et al., 2022)). Instead, we compared 16-day old C and PI unhandled beetles directly for survival after infection with live Bt, across microbiota manipulations (n=24 beetles/treatment/dietary resource/replicate populations). This is because evolved basal resistance of PI is an estimate relative to post-infection survival of control C beetles which did not evolve against Bt. We did not observe any mortality in sham-infected beetles.

We analysed priming and basal infection response data using a mixed effects Cox model (implemented in R, Therneau, 2015) with replicate population as a random effect, specified as: (1) Priming ~ Priming treatment (i.e., unprimed vs primed) x microbiota manipulation (i.e., UV-treated vs normal wheat flour) + (1|replicate population)] (2) Basal infection response ~ Selection regime (i.e., C & PI) x microbiota manipulation + (1|replicate population). A significant interaction

between priming treatment (or selection regime) and microbiota manipulation would indicate that the survival benefits of evolved priming (or evolved basal infection response) in I (or PI) populations vary significantly with disruption of microbiota. Further, to disentangle the changes in priming response of I beetles with vs without the microbiota manipulation, we analysed priming for each microbiota manipulation treatment separately, using a mixed effects Cox model specified as:  $\text{Priming} \sim \text{Priming treatment} + (1|\text{replicate population})$ , with priming treatment and replicate population as a fixed and random effect respectively.

B. Lifespan after priming: In a separate experiment, we collected virgin females reared in normal vs UV-sterilized wheat flour as described above ( $n=12$  females/treatment/microbiota manipulation/replicate population) to estimate the long-term survival benefits of priming (same dose as mentioned above) and basal infection response against a lower dose of infection adjusted to  $10^6$  cells in 75 $\mu$ l Ringer solution. We observed beetle mortality every 5 days until 90 days when most of them were dead. We analysed lifespan data using model specifications as described above.

C. Reproductive output: Finally, we measured the impact of microbiota manipulation on reproductive fitness of evolved PI and I beetles. We first paired 10-day-old unhandled virgin males and females across selection regimes and microbiota manipulation. After two days of mating, we separated the females and allowed each to oviposit for 48h in 5g wheat flour ( $n=39-52$ /treatment/replicate population). After 4 weeks, we counted the total number of eggs laid per female as a proxy for reproductive fitness. At each step, beetles were either given access to UV-irradiated or untreated flour, according to their rearing condition. We analysed the data using a mixed effects Generalised Linear Model with Quasi-Poisson error, specified as:  $\text{Reproduction} \sim \text{Selection regime (i.e., C, I, PI)} \times \text{microbiota manipulation} + (1|\text{replicate population})$ . To disentangle the changes in each selection regime, we also analysed them separately.

170 For each analysis, we could pool the data across replicate populations since population  
171 identity did not show any significant main impact or interactions as a fixed factor  
172 ( $P < 0.05$ ).

173

## RESULTS:

### I. Disruption of microbiota causes the loss of immune priming response but not basal resistance

Here, we present results from data pooled across replicate populations of each selection regime, since we did not find a significant population effect (see Methods). Separate analyses and plots for each replicate population are shown in the supplementary materials. We first compared the priming response of I beetles (with an evolved priming response) reared in normal vs UV-treated flour. We found a significant interaction between priming treatment and microbiota manipulations (Table S1A). Priming improved beetle survival only in I populations reared in the standard diet (normal wheat flour with microbes), but not when they consumed UV-treated flour (Fig. 1A, S2A; Table S1B, S1C). Thus, there was a loss of evolved priming ability with disruption of the dietary source of microbiota.

Subsequently, we compared C vs PI beetles to estimate the changes in basal resistance as a function of the microbiota manipulation. We found a significant main effect of the selection regime (as expected, PI beetles had higher, evolved basal resistance), but microbiota manipulation had no impact (Table S2). Further, the lack of a significant interaction between selection regime and microbiota manipulations indicated that the higher post-infection survival of PI beetles was not affected by their microbiota (Fig. 1B, S2B; Table S2).

These results corroborate another independent experiment where selected beetles were infected with a relatively lower dose of Bt and their lifespan was recorded until 90 days post-infection. Primed I beetles lived significantly longer when they were reared in the standard diet, but this benefit of priming disappeared when beetles were fed with UV-treated flour (Fig. 1C; S3A; Tables S3A, S3B, S3C). Hence, the longevity effects of priming also relied on the presence of microbiota. As expected, PI beetles lived longer than C beetles, regardless of the UV treatment of their diet (Fig. 1D, S3B; Table S4), suggesting that longevity effects of basal resistance do not depend on dietary microbes.

### II. Disrupting dietary microbes affects the reproductive potential of beetles with evolved priming, but not that of resistant beetles

Next, we analysed the effects of dietary microbe manipulations on reproductive output of beetle populations with divergent immune functions. Depletion of microbiota reduced



reproductive output in both C and I females, but not in PI females (Fig. 1E, S4; Table S5A). Interestingly, the negative effect of microbiome disruption was more pronounced in I beetles, with a steeper decline of fitness relative to C beetles (Fig. 1E). We also note that the results for pooled data of C populations (Fig. 1E) differ from individual replicate populations (Fig. S4; Table S5B), which separately did not show a significant impact of microbiota manipulation. However, all the populations showed a consistent trend towards lower reproductive output of C beetles in UV treated flour (Fig. S4).

Interestingly, C beetles (which evolved in the absence of pathogen selection) most closely represent the ancestral condition. Thus, starting from a baseline negative effect of microbiome loss on reproduction, in I populations the effect became more pronounced, whereas in PI populations the effect of microbiota was lost. Thus, the reproductive effects of microbiota potentially co-evolved with pathogen selection and host immune strategies.

## DISCUSSION:

In the past few decades, we have learnt that host-associated microbial communities can have major impacts on the host immune system and may have co-evolved with their hosts over evolutionary time (reviewed in Zheng et al., 2020). However, we lack direct evidence for the impact of microbiota on different components of the immune system when evolving under strong pathogen selection. This is possibly due to the lack of a suitable experimental system where evolutionary trajectories of different immune responses can be clearly distinguished. Previously, we reported a unique set of experimentally evolved beetle lines where pathogen-imposed selection led to the rapid, parallel and divergent evolution of either strong basal pathogen resistance (PI populations) or immune priming (I populations) as mutually exclusive responses (Khan et al. 2017; Prakash et al., 2022). Here, we showed that evolved basal resistance vs priming ability also have varied functional dependence on the host beetle microbiota. The disruption of microbiota led to a complete loss of the survival benefit of priming, whereas basal resistance to Bt infection remained unaffected. In beetles that evolved priming ability, depletion of microbiota also revoked the benefit of longer lifespan after priming and reduced their reproductive output; but this was not the case in resistant PI beetles. Impacts of microbiota as a function of evolved immune responses might thus extend to multiple fitness traits. Moreover, the absence of reproductive effects in PI beetles starkly contrasts the observation that in unselected

control C beetles an intact microbiota was necessary to maintain reproductive output. PI beetles thus also gained independence from the reproductive fitness effects of microbiota during evolution of basal resistance against pathogens.

Why does the effect of microbiome differ across evolved immune strategies? We speculate that the effects may be determined by how the microbiome modulates specific immune pathways underlying priming or basal infection responses. For example, in flour beetles, prior priming improves post-infection survival by controlling pathogen growth (Khan et al., 2019), with the help of canonical resistance mechanisms such as increased phenoloxidase response (Ferro et al., 2019). However, if the disruption in microbiome composition interferes with the activation of bactericidal phenoloxidase response in primed I beetles, they may have a higher pathogen burden, thereby neutralizing the net beneficial effects of priming. Recent experiments with the moth *Plodia interpunctella* corroborate this hypothesis: removal of gut bacteria reduced phenoloxidase activity and concomitantly increased mortality after Bt infection (Orozco-Flores et al., 2017). Dietary microbes may also somehow modulate the priming effects of Bt cells introduced into the beetle haemolymph via septic injury in our experiments, with the exciting implication of cross-talk between the gut environment and priming responses produced in the haemolymph (Freitak et al., 2007; Kwong et al., 2013). In contrast, the evolved basal infection resistance of PI beetles might have been achieved by improving overall body condition (Prakash et al., 2022), which could have also increased their ability to withstand the effects of infection (i.e., increased tolerance, Seal et al., 2021), without directly activating or involving the immune response. As a result, the immunomodulatory effects of microbiota might not be relevant for PI beetles anymore. Another possibility is that distinct sets of microbes may regulate the efficiency of evolved basal resistance vs priming, with the former being UV-resistant and the latter UV-sensitive.

Finally, we note that the potential divergence in microbiomes as well as beetle immune function may be unlinked, with each being driven independently by the specific selection regime. Whether this hypothesis is true, and if so, what is the direction of causality, remains to be determined. For instance, the beetle microbiome could be first rapidly altered by Bt infection (Li et al., 2020), due to infection-induced changes in host physiology. Since I vs. PI regimes involved differential exposure to Bt, the two regimes may have allowed for

266 divergent changes in the microbiome. Eventually, the altered microbiomes could have  
 267 facilitated the subsequent evolution of beetle immune function. Alternatively, beetle  
 268 immune function may have diverged first across regimes (Cherif et al., 2008), changing the  
 269 resident microbiomes later as a by-product. To distinguish between these alternatives, one  
 270 would need to analyse the time course of change in host immune function as well as  
 271 microbiomes during evolution. We hope that our results revealing the possibility of  
 272 divergent impacts of microbiota across immune strategies will spur further work to test  
 273 whether or to what extent these changes in the host immune function and microbiome are  
 274 causally linked, and if so, through what mechanism.

275

## Acknowledgements

We thank Biswajit Shit, Devashish Kumar, Mrudula Sane, Pratibha Sanjenbam, Shivansh Singhal, Shyamsunder Buddh, and Srijan Seal for feedback on the manuscript. We thank Kunal Ankola, Pavan Thunga, Sunidhi Thakur and Shyamsunder Buddh for laboratory assistance.

## Author contributions

IK conceived the experiment; IK, AP and DA designed the experiment; AP performed the experiment; AP and IK analyzed the data. IK & DA wrote the manuscript with inputs from AP.

## Funding

We thank Ashoka University, SERB-DST (ECR/2017/003370 to IK), the National Centre for Biological Sciences (NCBS-TIFR) and the Department of Atomic Energy, Government of India (Project Identification No. RTI 4006), and the DBT/Wellcome Trust India Alliance (IA/I/17/1/503091 to DA) for funding this research.

## Competing interests

None

## References

- Agarwal, A., Agashe, D., 2020. The red flour beetle *Tribolium castaneum*: A model for host-microbiome interactions. *PLoS ONE* 15, e0239051.  
<https://doi.org/10.1371/journal.pone.0239051>
- Belkaid, Y., Hand, T.W., 2014. Role of the microbiota in immunity and inflammation. *Cell* 157, 121–41. <https://doi.org/10.1016/j.cell.2014.03.011>
- Cherif, A., Rezgui, W., Raddadi, N., Daffonchio, D., Boudabous, A., 2008. Characterization and partial purification of entomocin 110, a newly identified bacteriocin from *Bacillus thuringiensis* subsp. *Entomocidus* HD110. *Microbiological Research* 163, 684–692. <https://doi.org/10.1016/j.micres.2006.10.005>
- Chudnovskiy, A., Mortha, A., Kana, V., Kennard, A., Ramirez, J.D., Rahman, A., Remark, R., Mogno, I., Ng, R., Gnjjatic, S., Amir, E. ad D., Solovyov, A., Greenbaum, B., Clemente, J., Faith, J., Belkaid, Y., Grigg, M.E., Merad, M., 2016. Host-Protozoan Interactions Protect from Mucosal Infections through Activation of the Inflammasome. *Cell* 167, 444–456.e14. <https://doi.org/10.1016/j.cell.2016.08.076>
- Dillon, R.J., Dillon, V.M., 2003. THE GUT BACTERIA OF INSECTS: Nonpathogenic Interactions. *Annual Review of Entomology* 49, 71–92.  
<https://doi.org/10.1146/annurev.ento.49.061802.123416>

Engel, P., Moran, N.A., 2013. The gut microbiota of insects - diversity in structure and function. *FEMS Microbiology Reviews* 37, 699–735. <https://doi.org/10.1111/1574-6976.12025>

Ferro, K., Peuß, R., Yang, W., Rosenstiel, P., Schulenburg, H., Kurtz, J., 2019. Experimental evolution of immunological specificity. *Proc Natl Acad Sci USA* 116, 20598–20604. <https://doi.org/10.1073/pnas.1904828116>

Freitak, D., Wheat, C.W., Heckel, D.G., Vogel, H., 2007. Immune system responses and fitness costs associated with consumption of bacteria in larvae of *Trichoplusia ni*. *BMC Biology* 5, 56. <https://doi.org/10.1186/1741-7007-5-56>

Futo, M., Armitage, S.A., Kurtz, J., 2015. Microbiota plays a role in oral immune priming in *Tribolium castaneum*. <https://doi.org/10.3389/fmicb.2015.01383>

Gould, A.L., Zhang, V., Lamberti, L., Jones, E.W., Obadia, B., Korasidis, N., Gavryushkin, A., Carlson, J.M., Beerenwinkel, N., Ludington, W.B., 2018. Microbiome interactions shape host fitness. *Proceedings of the National Academy of Sciences* 115, E11951–E11960. <https://doi.org/10.1073/pnas.1809349115>

Karimi, K., Inman, M.D., Bienenstock, J., Forsythe, P., 2009. *Lactobacillus reuteri*-induced regulatory T cells protect against an allergic airway response in mice. *American Journal of Respiratory and Critical Care Medicine* 179, 186–193. <https://doi.org/10.1164/rccm.200806-951OC>

Khan, I., Prakash, A., Agashe, D., 2019. Pathogen susceptibility and fitness costs explain variation in immune priming across natural populations of flour beetles. *J Anim Ecol* 88, 1332–1342. <https://doi.org/10.1111/1365-2656.13030>

Khan, I., Prakash, A., Agashe, D., 2017. Experimental evolution of insect immune memory versus pathogen resistance. *Proceedings. Biological sciences* 284, 20171583. <https://doi.org/10.1098/rspb.2017.1583>

Khan, I., Prakash, A., Agashe, D., 2016. Divergent immune priming responses across flour beetle life stages and populations. *Ecol Evol* 6, 7847–7855. <https://doi.org/10.1002/ece3.2532>

Kostic, A.D., Xavier, R.J., Gevers, D., 2014. The Microbiome in Inflammatory Bowel Disease: Current Status and the Future Ahead. *Gastroenterology, The Gut Microbiome in Health and Disease* 146, 1489–1499. <https://doi.org/10.1053/j.gastro.2014.02.009>

Kwong, W.K., Mancenido, A.L., Moran, N.A., 2013. Immune system stimulation by the native gut microbiota of honey bees. *Royal Society Open Science* 4, 170003. <https://doi.org/10.1098/rsos.170003>

Lee, Y.K., Mazmanian, S.K., 2010. Has the microbiota played a critical role in the evolution of the adaptive immune system? *Science* 330, 1768–1773. <https://doi.org/10.1126/science.1195568>

Li, S., de Mandal, S., Xu, X., Jin, F., 2020. The tripartite interaction of host immunity-bacillus thuringiensis infection-gut microbiota. *Toxins*. <https://doi.org/10.3390/toxins12080514>

Mayer, A., Mora, T., Rivoire, O., Walczak, A.M., 2016. Diversity of immune strategies explained by adaptation to pathogen statistics. *Proceedings of the National Academy of Sciences* 113, 8630–8635. <https://doi.org/10.1073/pnas.1600663113>

Mazmanian, S.K., Cui, H.L., Tzianabos, A.O., Kasper, D.L., 2005. An immunomodulatory molecule of symbiotic bacteria directs maturation of the host immune system. *Cell* 122, 107–118. <https://doi.org/10.1016/j.cell.2005.05.007>

McLaren, M.R., Callahan, B.J., 2020. Pathogen resistance may be the principal evolutionary advantage provided by the microbiome. *Philosophical Transactions of the Royal Society B: Biological Sciences* 375, 20190592. <https://doi.org/10.1098/rstb.2019.0592>

Muhammad, A., Habineza, P., Ji, T., Hou, Y., Shi, Z., 2019. Intestinal Microbiota Confer Protection by Priming the Immune System of Red Palm Weevil *Rhynchophorus ferrugineus* Olivier (Coleoptera: Dryophthoridae). *Frontiers in Physiology* 10. <https://doi.org/10.3389/fphys.2019.01303>

Orozco-Flores, A.A., Valadez-Lira, J.A., Oppert, B., Gomez-Flores, R., Tamez-Guerra, R., Rodríguez-Padilla, C., Tamez-Guerra, P., 2017. Regulation by gut bacteria of immune response, *Bacillus thuringiensis* susceptibility and hemolin expression in *Plodia interpunctella*. *Journal of Insect Physiology* 98, 275–283. <https://doi.org/10.1016/j.jinsphys.2017.01.020>

Prakash, A., Agashe, D., Khan, I., 2022. The costs and benefits of basal infection resistance vs immune priming responses in an insect. *Developmental & Comparative Immunology* 126, 104261. <https://doi.org/10.1016/j.dci.2021.104261>

Seal, S., Dharmarajan, G., Khan, I., 2021. Evolution of pathogen tolerance and emerging infections: A missing experimental paradigm. *eLife* 10, e68874. <https://doi.org/10.7554/eLife.68874>

Thaiss, C.A., Zmora, N., Levy, M., Elinav, E., 2016. The microbiome and innate immunity. *Nature* 535, 65–74. <https://doi.org/10.1038/nature18847>

Therneau, T., 2015. Mixed Effects Cox Models, in: *Mixed Effects Cox Models*. CRAN repository.

Zheng, D., Liwinski, T., Elinav, E., 2020. Interaction between microbiota and immunity in health and disease. *Cell Res* 30, 492–506. <https://doi.org/10.1038/s41422-020-0332-7>

# 384 FIGURES

385 **Figure 1.** Effects of microbiota disruption by UV-irradiation of flour on **(A)** priming response  
386 (i.e., post-infection survival of primed vs unprimed individuals) of I beetles (with evolved  
387 priming); **(B)** basal resistance to Bt, i.e. post-infection survival of C (Control beetles) vs PI  
388 populations (with evolved higher basal resistance); **(C)** Lifespan of I beetles after priming  
389 and low dose of Bt; **(D)** Lifespan of C vs PI beetles after low dose of infection; **(E)**  
390 Reproductive fitness of naïve beetles from C, PI and I populations. In panel E, asterisks  
391 indicate significantly different groups. C= Control populations; I (or PI) = Replicate  
392 populations that evolved priming (or strong basal resistance); Normal= untreated wheat  
393 flour; +UV= UV-irradiated wheat flour; ns= not significant. Each panel represents pooled  
394 data across replicate populations (see Figs S2-4 for individual replicate populations). For  
395 panels A and B, n=24 beetles/priming and infection treatment/microbiota  
396 manipulation/replicate population; for panels C and D, n=12 females/priming and infection  
397 treatment/microbiota manipulation/replicate population; for panel E, n=39-52/microbiota  
398 manipulation/replicate population.

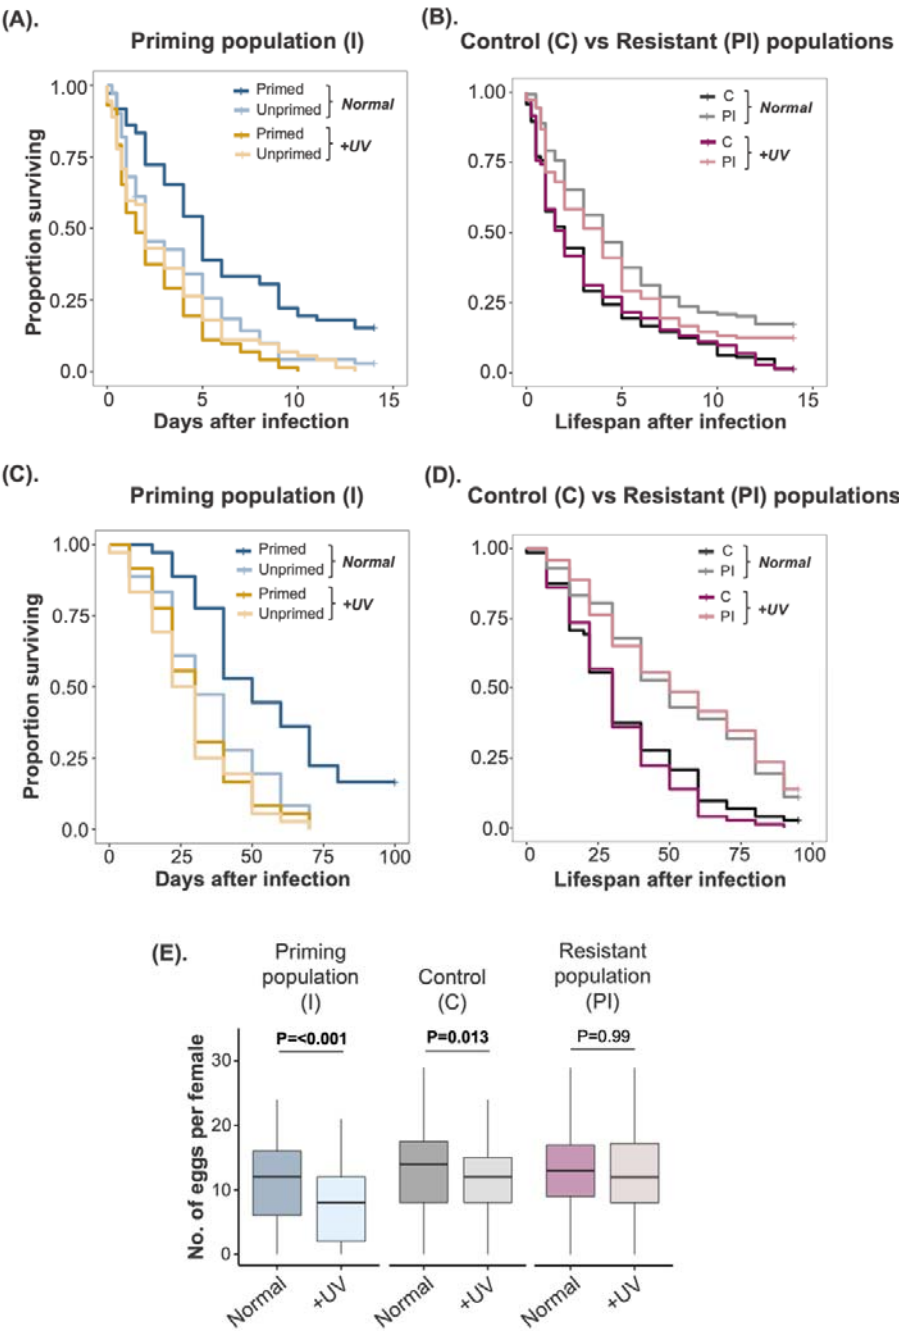

399

400



## SUPPLEMENTARY INFORMATION

### Supplementary methods

#### I. Priming and infection protocol

We used a strain of *Bacillus thuringiensis* (Bt - DSM 2046), isolated from a Mediterranean flour moth (Roth et al., 2009), as a model bacterial pathogen to prime and infect adult beetles (see Khan et al., 2017). To prime beetles, we pricked them between their head and thorax with a 0.1 mm insect pin (Fine Science Tools, CA) dipped in heat-killed bacterial slurry adjusted to  $10^{11}$  cells/100 $\mu$ l Ringer solution, prepared from freshly grown overnight Bt culture at 30°C (optical density OD<sub>600</sub> = 0.95). We used insect Ringer solution as mock priming (unprimed). The priming with heat-killed Bt cells can activate the immune response without imposing any direct cost of infection. Six days after priming, we infected both primed and unprimed individuals with a live bacterial culture adjusted to  $\sim 10^{10}$  cells in 75  $\mu$ l insect Ringer solution. To measure lifespan after mounting a priming response, we used a milder dose of live bacterial culture adjusted to  $\sim 10^6$  cells in 75  $\mu$ l insect Ringer solution which does not cause any immediate mortality (within 7 days).

#### II. Experimental evolution protocol (see Khan et al., 2017 for detailed protocol)

Briefly, at every generation of experimental evolution, we primed 10-day-old virgin PI adults from each replicate population with heat-killed Bt, as described above. Simultaneously, we also mock-primed 10-day-old virgin adult C and I beetles with sterile insect Ringer solution. After six days, we challenged individuals from I and PI regimes with high dose of live Bt infection as described above, whereas C beetles were just pricked with sterile insect ringer solution (mock challenge). Hence, we had two infection regimes where populations were challenged with a high dose of Bt infection, with (PI populations) or without (I Populations) the opportunity of priming; and a control regime (C populations) where beetles were never exposed to Bt antigen. Following the priming and infection treatments, we combined 60 pairs of surviving males and females from each replicate population and allowed females to oviposit for 5 days to initiate the next generation. We repeated the same protocol for 15 generations, and then allowed two generations of relaxed selection (i.e., no pathogen exposure) before we commenced the assays described in this study.

432 **Supplementary figures**

433 **Figure S1.** Representative LB agar plates to show the depletion of culturable microbiota after UV-  
434 irradiation of wheat flour

435

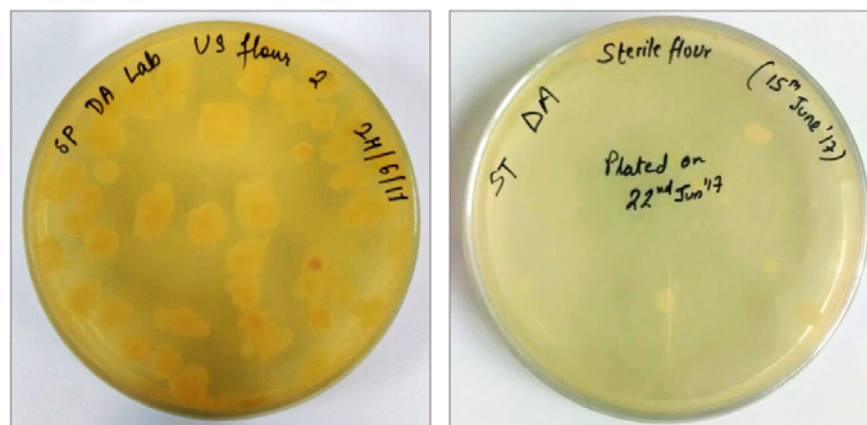

Normal wheat flour

UV-irradiated flour

436

437

**Figure S2.** Effects of microbiota disruption by UV-irradiation on (A) priming response (measured as the difference between post-infection survival of primed vs unprimed individuals) of each beetle replicate populations that evolved priming (I1, I2, I4 replicate populations) (n=24 beetles/priming and infection treatment/microbiota manipulation/replicate population); (B) Post-infection survival of beetles from each replicate control population (C1, 2 & 4 populations) vs beetles that evolved strong basal resistance (PI1, 2, 4 populations) (n=24 beetles/infection treatment/ microbiota manipulation/replicate populations). C1 and PI1, C2 and PI2, and C3 and PI3 were handled together during the experiment. Normal= Normal wheat flour; +UV= UV-irradiated wheat flour.

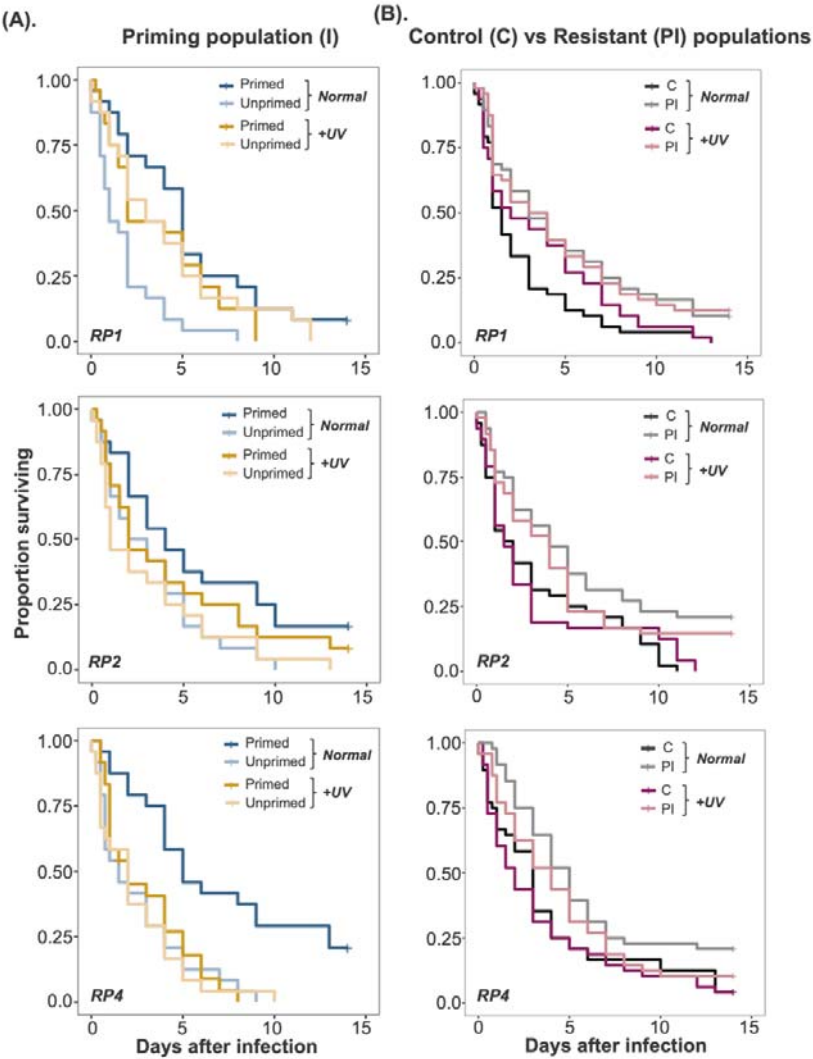

**Figure S3:** Effects of microbiota disruption by UV-irradiation on (A) lifespan after priming response (measured as the difference between post-infection lifespan of primed vs unprimed individuals) of each beetle replicate populations that evolved priming (I1, I2, I4 populations) (n=24 beetles/priming and infection treatment/ microbiota manipulation/replicate population); (B) post-infection lifespan of each replicate populations of control beetles (C1, 2 & 4 populations) vs beetles that evolved strong basal resistance (PI1, 2, 4 populations) (n=24 beetles/infection treatment/ microbiota manipulation/replicate populations). C1 and PI1, C2 and PI2, and C3 and PI3 were handled together during the experiment. Normal= Normal wheat flour; +UV= UV-irradiated wheat flour.

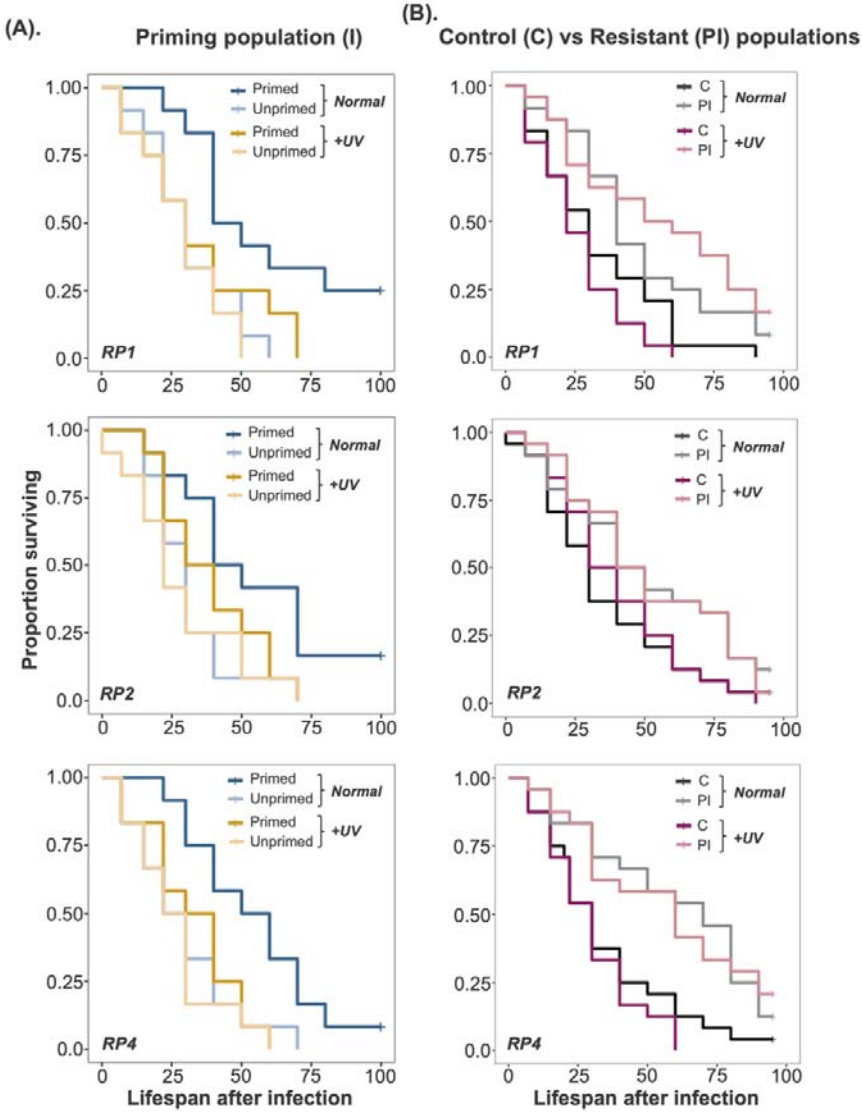

**Figure S4:** Effects of microbiota disruption by UV-irradiation on reproductive fitness of naïve beetles from each replicate populations of C, PI, and I populations (n=39-52 females/treatment/replicate population). Normal= Normal wheat flour; +UV= UV-irradiated wheat flour.

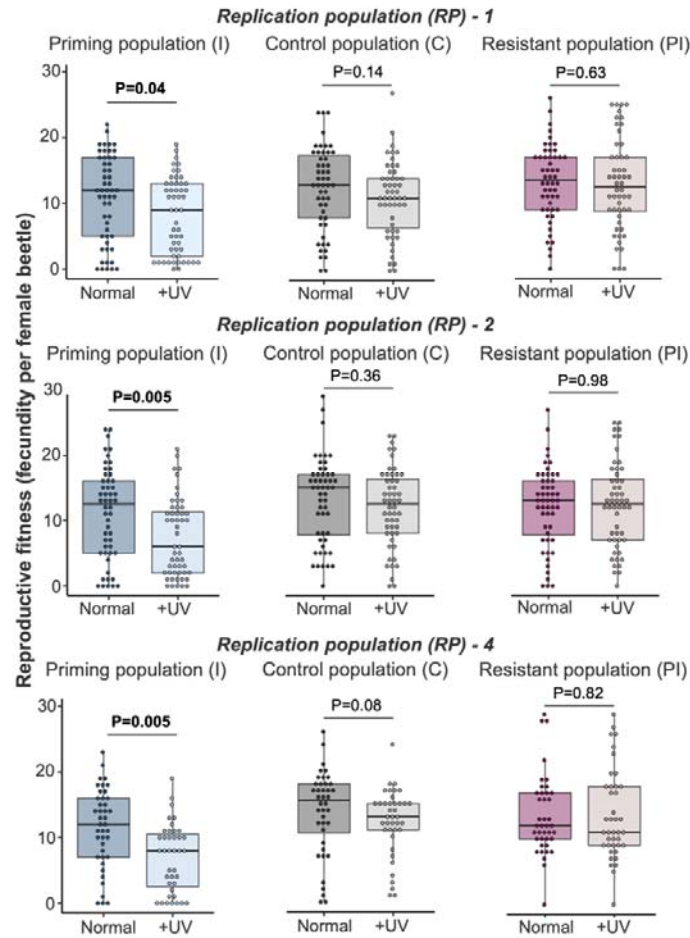

## Supplementary tables

**Table S1.** Summary of a mixed effects Cox model analysis to estimate the changes in priming response of I (experimentally evolved priming) population (**A**) as a function of microbiota disruption. We specified the model as: Priming response ~ Priming treatment (P) x microbiota manipulation (M) + (1|replicate population (RP)), with 'P' and 'M' as fixed effects, and RP as a random effect; (**B**) separately across microbiota manipulations (i.e., normal vs UV-irradiated flour). For each microbiota manipulation type, we specified the model as: Priming response ~ Priming treatment (P) + 1|replicate population (RP)], with 'P' as a fixed effect, and RP as a random effect; (**C**) Summary of a Cox proportional hazard analysis for priming response in each of the replicate I populations after disruption of dietary microbes.

| A. Selection regime | Source                      | loglik  | chiSq | df | p      |
|---------------------|-----------------------------|---------|-------|----|--------|
| I population        | Priming treatment (P)       | -1307.1 | 23.72 | 1  | <0.001 |
|                     | Microbiota manipulation (M) | -1306.1 | 1.965 | 1  | 0.16   |
|                     | P x M                       | -1300.3 | 11.61 | 1  | <0.001 |
|                     | Random effects              | Std dev |       |    |        |
|                     | Replicate population (RP)   | 0.0053  |       |    |        |

| B. Selection regime | Resource            | Source         | loglik  | chiSq  | df | p      |
|---------------------|---------------------|----------------|---------|--------|----|--------|
| I population        | Normal wheat        | P              | -542.05 | 31.004 | 1  | <0.001 |
|                     |                     | Random effects | Std dev |        |    |        |
|                     |                     | RP             | 0.12    |        |    |        |
|                     | UV-irradiated flour | P              | -560.02 | 1.7872 | 1  | 0.18   |
|                     |                     | Random effects | Std dev |        |    |        |
|                     |                     | RP             | 0.10    |        |    |        |

| C. Replicate population | Resource            | df | Chi. Sq. | p      |
|-------------------------|---------------------|----|----------|--------|
| 1                       | Normal wheat        | 1  | 12.547   | 0.0004 |
|                         | UV-irradiated flour | 1  | 0.1684   | 0.68   |
| 2                       | Normal wheat        | 1  | 4.1869   | 0.04   |
|                         | UV-irradiated flour | 1  | 1.5243   | 0.21   |
| 4                       | Normal wheat        | 1  | 11.905   | 0.0006 |
|                         | UV-irradiated flour | 1  | 0.445    | 0.50   |

**Table S2.** Summary of a mixed effects Cox model analysis on survival data of beetles from control (C) vs resistant (PI) populations as a function of microbiota manipulation. We specified the model as: Post-infection survival ~ Selection regime (SR) x microbiota manipulation (M) + (1|Replicate population (RP)), with 'SR' and 'M' as fixed effects, and RP as a random effect.

| A. Comparison | Trait | loglik | chiSq | df | p |
|---------------|-------|--------|-------|----|---|
|---------------|-------|--------|-------|----|---|

|                |                             |                |       |   |                  |
|----------------|-----------------------------|----------------|-------|---|------------------|
| C vs PI regime | Selection regime (SR)       | -2934.2        | 36.32 | 1 | <b>&lt;0.001</b> |
|                | Microbiota manipulation (M) | -2933.9        | 0.758 | 1 | 0.38             |
|                | SR x M                      | -2933.1        | 1.651 | 1 | 0.19             |
|                | <i>Random effects</i>       | <i>Std dev</i> |       |   |                  |
|                | <i>Replicate population</i> | <i>0.004</i>   |       |   |                  |

**Table S3.** Summary of a mixed effects Cox model analysis to estimate the changes in lifespan of I beetles after priming response (A) as a function microbiota disruption. We specified the model as: Lifespan ~ Priming treatment (P) x Microbiota manipulation (M) + (1|Replicate population (RP)), with 'P' and 'M' as fixed effects, and RP as a random effect; (B) separately across microbiota manipulations (i.e., normal vs UV-irradiated flour). For each microbiota manipulation type, we specified the model as: Lifespan ~ Priming treatment (P) + 1|Replicate population (RP), with 'P' as a fixed effect, and RP as a random effect; (C) Summary of a Cox proportional hazard analysis for lifespan after priming response in each of the replicate I populations after disruption of dietary microbes.

| A.           | Regime | Source                           | loglik         | chiSq | df | p                |
|--------------|--------|----------------------------------|----------------|-------|----|------------------|
| I population |        | Priming treatment (P)            | -558.28        | 20.40 | 1  | <b>&lt;0.001</b> |
|              |        | Microbiota manipulation (M)      | -554.30        | 7.953 | 1  | <b>0.004</b>     |
|              |        | P x M                            | -551.68        | 5.237 | 1  | <b>0.02</b>      |
|              |        | <i>Random effects</i>            | <i>Std dev</i> |       |    |                  |
|              |        | <i>Replicate population (RP)</i> | <i>0.0043</i>  |       |    |                  |

| B.           | Selection regime    | Resource | Source                | loglik         | chiSq  | df | p                |
|--------------|---------------------|----------|-----------------------|----------------|--------|----|------------------|
| I population | Normal wheat        |          | P                     | -222.52        | 19.755 | 1  | <b>&lt;0.001</b> |
|              |                     |          | <i>Random effects</i> | <i>Std dev</i> |        |    |                  |
|              |                     |          | <i>RP</i>             | <i>0.009</i>   |        |    |                  |
|              | UV-irradiated flour |          | P                     | -237.55        | 2.8548 | 1  | 0.09             |
|              |                     |          | <i>Random effects</i> | <i>Std dev</i> |        |    |                  |
|              |                     |          | <i>RP</i>             | <i>0.009</i>   |        |    |                  |

| C. | Replicate population | Resource            | Df | Chi. Sq. | p            |
|----|----------------------|---------------------|----|----------|--------------|
| 1  |                      | Normal wheat        | 1  | 5.1395   | <b>0.023</b> |
|    |                      | UV-irradiated flour | 1  | 0.7086   | 0.39         |
| 2  |                      | Normal wheat        | 1  | 4.1535   | <b>0.041</b> |
|    |                      | UV-irradiated flour | 1  | 0.7907   | 0.37         |
| 4  |                      | Normal wheat        | 1  | 4.9412   | <b>0.02</b>  |
|    |                      | UV-irradiated flour | 1  | 0.3982   | 0.52         |

**Table S4.** Summary of a mixed effects Cox model analysis on lifespan data of beetles from control (C) vs resistant (PI) populations after a mild infection dose, as a function of microbiota manipulation.

We specified the model as: Lifespan ~ Selection regime (SR) x Microbiota manipulation (M) + (1|Replicate population (RP)), with 'SR' and 'M' as fixed effects, and RP as a random effect.

| Comparison         | Source                      | loglik   | chiSq | df | p      |
|--------------------|-----------------------------|----------|-------|----|--------|
| C vs PI population | Selection regime (SR)       | -1281.9  | 44.83 | 1  | <0.001 |
|                    | Microbiota manipulation (M) | -1281.8  | 0.185 | 1  | 0.66   |
|                    | SR x M                      | -1281.2  | 1.206 | 1  | 0.27   |
|                    | Random effects              | Std dev. |       |    |        |
|                    | Replicate population        | 0.02     |       |    |        |

**Table S5: A.** Summary of a generalized linear mixed effects model best fitted to Quasi-Poisson distribution for changes in the reproductive output across selection regimes (C, I and PI) as a function of microbiota manipulation (i.e., Normal vs UV-irradiated wheat). We specified the model as: Reproductive output ~ Selection regime x Microbiota manipulation + (1|Replicate population), with 'selection regime' and 'Microbiota manipulation' as fixed effects and 'replicate population' as a random effect.

| A. | Source                      | chiSq     | df | p      |
|----|-----------------------------|-----------|----|--------|
|    | Selection regime (SR)       | 167.406   | 2  | <0.001 |
|    | Microbiota manipulation (M) | 56.454    | 1  | <0.001 |
|    | SR x M                      | 55.698    | 1  | <0.001 |
|    | Random effects              | Std error |    |        |
|    | Replicate population        | 0.01      |    |        |

## Supplementary references

- Khan, I., Prakash, A., Agashe, D., 2017. Experimental evolution of insect immune memory versus pathogen resistance. Proc. R. Soc. B. 284, 20171583. <https://doi.org/10.1098/rspb.2017.1583>
- Roth, O., Sadd, B.M., Schmid-Hempel, P., Kurtz, J., 2009. Strain-specific priming of resistance in the red flour beetle, *Tribolium castaneum*. Proceedings. Biological sciences / The Royal Society 276, 145–51. <https://doi.org/10.1098/rspb.2008.1157>
